# Supplementary material for: Phenotypes and Genotypes of Inherited Disorders of Biogenic Amine Neurotransmitter Metabolism
Source: Genes (Basel). 2023 Jan 19;14(2):263. doi: 10.3390/genes14020263 (PMC9957200; doi:10.3390/genes14020263)
Supplement: Supplementary file 1 [file genes-14-00263-s001.zip › Table S1.xlsx]

## Sheet: variant type ALL_genes
																							Distribution of variations types that affects the main genes involved in inherited disorders of biogenic amine metabolism. Retained Pathogenic Variants criteria are: ClinVar (Pathogenic, no conflicts criteria provided) + BioPKU (Pathogenic) short variants < 50bp and ClinVar Pathogenic (no conflicts criteria provided) long variants variants > 50bp with clinical conditions compatible with biogenic …

## Sheet: GCH1 Short Variants_Pathogeneti
	Name HGVS [Other name]	Condition(s)	ClinVar Accession	References
	NM_000161.3(GCH1):c.1A>G (p.Met1?)	Dystonia 5|GTP cyclohydrolase I deficiency	VCV000642685	DOI: 10.1007/s00702-012-0777-z
	NM_000161.3(GCH1):c.248dup (p.Glu84Argfs*40)	Dystonia 5|GTP cyclohydrolase I deficiency	VCV000640887
	NM_000161.3(GCH1):c.250G>T (p.Glu84*)	Dystonia 5|GTP cyclohydrolase I deficiency	VCV000958404	DOI: 10.1111/j.1469-8749.2010.03619.x
	NM_000161.3(GCH1):c.323G>A (p.Gly108Asp)	Dystonia 5|GTP cyclohydrolase I deficiency	VCV000009282	DOI: 10.1002/ana.410440107
	NG_008647.1:g.60694G>A [NM_000161.3(GCH1):c.510-1G>A]	not provided	VCV000447375
ClinVar Pathogenic (two stars)	NG_008647.1:g.60727G>T [NM_000161.3(GCH1):c.541+1G>T]	Dystonia 5|GTP cyclohydrolase I deficiency	VCV000489338
criteria provided, multiple submitters, no conflicts	NM_000161.3(GCH1):c.607G>A (p.Gly203Arg)	Dystonia 5|GTP cyclohydrolase I deficiency	VCV000381665	https://doi.org/10.1016/S0387-7604(00)00135-2 DOI: 10.1023/a:1010544316387 DOI: 10.1002/ajmg.b.31058 DOI: 10.1002/mds.22976 DOI: 10.1111/j.1468-1331.2010.03082.x DOI: 10.1007/s11910-014-0461-9 DOI: 10.1002/brb3.906
(accession Sept 16, 2022)	NM_000161.3(GCH1):c.614T>A (p.Val205Glu)	Dystonia 5|GTP cyclohydrolase I deficiency	VCV000574828	DOI: 10.1023/B:BOLI.0000037349.08483.96 DOI: 10.1002/jmd2.12199 DOI: 10.1111/cge.13955
	NG_008647.1:g.62058G>A [NM_000161.3(GCH1):c.626+1G>A]	Dystonia 5|GTP cyclohydrolase I deficiency	VCV000529415	DOI: 10.1023/a:1010544316387 DOI: 10.1002/ana.410440312 https://doi.org/10.1093/brain/awp084
	NG_008647.1:g.62058G>T [NM_000161.3(GCH1):c.626+1G>T]	Dystonia 5|GTP cyclohydrolase I deficiency	VCV000449485	https://doi.org/10.1093/brain/awp084
	NM_000161.3(GCH1):c.631_632del (p.Met211Valfs*38)	Inborn genetic diseases|Dystonia 5|GTP cyclohydrolase I deficiency|not provided|Dystonia 5	VCV000265173	https://doi.org/10.1093/brain/awp084 DOI: 10.1007/8904_2012_144 DOI: 10.1371/journal.pone.0106388 DOI: 10.1002/brb3.906 DOI: 10.3389/fped.2020.00083
	NM_000161.3(GCH1):c.646C>T (p.Arg216*)	Dystonia 5|GTP cyclohydrolase I deficiency	VCV000803028	DOI: 10.1007/s00415-014-7265-3
	NM_000161.3(GCH1):c.1A>C (p.Met1?)	Dystonia 5|GTP cyclohydrolase I deficiency	VCV001452723
	NM_000161.3(GCH1):c.1A>T (p.Met1?)	Dystonia 5|GTP cyclohydrolase I deficiency	VCV000465758	DOI: 10.3346/jkms.2011.26.9.1244 https://doi.org/10.3346/jkms.2011.26.9.1244
	NM_000161.3(GCH1):c.26_27insTCT (p.Pro9_Ala10insLeu)	GTP cyclohydrolase I deficiency	VCV000803029
	NM_000161.3(GCH1):c.76del (p.Asp26fs*41)	Dystonia 5|GTP cyclohydrolase I deficiency	VCV000647643
	NM_000161.3(GCH1):c.322G>A (p.Gly108Ser)	Dystonia 5|GTP cyclohydrolase I deficiency	VCV001457832
	NM_000161.3(GCH1):c.109G>T (p.Glu37*)	Dystonia 5|GTP cyclohydrolase I deficiency	VCV001354621
	NM_000161.3(GCH1):c.127_130dup (p.Ala44fs*22)	Dystonia 5|GTP cyclohydrolase I deficiency	VCV000641586
	NM_000161.3(GCH1):c.142C>T (p.Gln48*)	Dystonia 5|GTP cyclohydrolase I deficiency	VCV000009288	DOI: 10.1159/000053355
	NM_000161.3(GCH1):c.158G>A (p.Trp53*)	Dystonia 5|GTP cyclohydrolase I deficiency	VCV001070688
	NM_000161.3(GCH1):c.159G>A (p.Trp53*)	not provided	VCV000280517	DOI: 10.1016/j.clineuro.2005.10.004 DOI: 10.7916/D86W98SW
	NM_000161.3(GCH1):c.186_197delinsA (p.Asp63fs*4)	Dystonia 5|GTP cyclohydrolase I deficiency	VCV000529414
	NM_000161.3(GCH1):c.212del (p.Leu71fs*9)	Dystonia 5|GTP cyclohydrolase I deficiency	VCV001419261
	NM_000161.3(GCH1):c.220_223del (p.Ala74fs*5)	Dystonia 5|GTP cyclohydrolase I deficiency	VCV000573159
	NM_000161.3(GCH1):c.220_223dup (p.Tyr75fs*50)	not provided	VCV001298582
	NM_000161.3(GCH1):c.278dup (p.Thr94fs*30)	Dystonia 5|GTP cyclohydrolase I deficiency	VCV000465759
	NG_008647.1:g.42388G>A [NM_000161.3(GCH1):c.344-1G>A]	Dystonia 5|GTP cyclohydrolase I deficiency	VCV000529413
	NG_008647.1:g.42388G>C [NM_000161.3(GCH1):c.344-1G>C]	Dystonia 5|GTP cyclohydrolase I deficiency	VCV000465761
ClinVar Pathogenic (one star)	NM_000161.3(GCH1):c.395_396del (p.Val132fs*10)	Dystonia 5|GTP cyclohydrolase I deficiency	VCV001457490
criteria provided, single submitter	NG_008647.1:g.42499G>C [NM_000161.3(GCH1):c.453+1G>C]	Dystonia 5|GTP cyclohydrolase I deficiency	VCV000009279
(accession Sept 16, 2022)	NG_008647.1:g.42500T>G [NM_000161.3(GCH1):c.453+2T>G]	Dystonia 5|GTP cyclohydrolase I deficiency	VCV001455907	https://doi.org/10.1002/ana.410440312
	NG_008647.1:g.48087A>G [NM_000161.3(GCH1):c.454-2A>G]	Dystonia 5|GTP cyclohydrolase I deficiency	VCV000871220
	NM_000161.3(GCH1):c.473del (p.Pro158fs*15)	Dystonia 5|GTP cyclohydrolase I deficiency	VCV000848233
	NM_000161.3(GCH1):c.509+1_509+3delinsTGTGAG	Dystonia 5|GTP cyclohydrolase I deficiency	VCV000641360
	NG_008647.1:g.60694G>T [NM_000161.3(GCH1):c.510-1G>T]	Dystonia 5	VCV001685844
	NG_008647.1:g.60694G>C [NM_000161.3(GCH1):c.510-1G>C]	not provided	VCV000449757
	NM_000161.3(GCH1):c.532A>T (p.Arg178*)	Dystonia 5|GTP cyclohydrolase I deficiency	VCV000640160
	NG_008647.1:g.60727G>C [NM_000161.3(GCH1):c.541+1G>C]	Dystonia 5|GTP cyclohydrolase I deficiency	VCV000465762
	NM_000161.3(GCH1):c.550C>T (p.Arg184Cys)	Dystonia 5|GTP cyclohydrolase I deficiency	VCV001460390
	NM_000161.3(GCH1):c.551G>A (p.Arg184His)	GTP cyclohydrolase I deficiency	VCV000009290	DOI: 10.1093/brain/awu179 DOI: 10.1007/s11910-014-0461-9 DOI: 10.1007/s12031-019-01301-3
	NM_000161.3(GCH1):c.601G>T (p.Gly201*)	Dystonia 5	VCV001685843
	NG_008647.1:g.62059dup [NM_000161.3(GCH1):c.626+2dup]	Dystonia 5|GTP cyclohydrolase I deficiency	VCV000996113
	NM_000161.3(GCH1):c.728dup (p.Phe244fs*6)	Dystonia 5	VCV001334460
	NM_000161.3(GCH1):c.752G>C (p.*251Serext*35)	not provided	VCV000447377
	NM_000161.3(GCH1): c.1_753del (Ex1_Ex6 deletion)	Dystonia 5	VCV000009291	DOI: 10.1212/01.WNL.0000152839.50258.A2
	NM_000161.3(GCH1):c.22G>T (p.Ala8Ser)	Dystonia 5	VCV000966562
	NM_000161.3(GCH1):c.126dup (p.Glu43Argfs*22)	Dystonia 5	VCV000560371
	NM_000161.3(GCH1):c.401A>T (p.Asp134Val)	Dystonia 5	VCV000009272	DOI: 10.1093/hmg/5.3.403 DOI: 10.1038/ng1194-236
BioPKU_ PNDdb Pathogenetic	NM_000161.3(GCH1):c.404T>A (p.Ile135Lys)	Dystonia 5	VCV000009285	DOI: 10.1097/00001756-199902250-00008
(accession Sept 16, 2022)	NM_000161.3(GCH1):c.431A>C (p.His144Pro)	Dystonia 5	VCV000009278	DOI: 10.1002/ana.410400517 DOI: 10.1136/jnnp.64.4.469	DOI: 10.1136/jnnp.64.4.469DOI: 10.1212/wnl.52.1.182
	NM_000161.3(GCH1):c.595C>G (p.Pro199Ala)	Dystonia 5	VCV000009292	DOI: 10.1212/01.wnl.0000044049.99690.ad DOI: 10.1023/B:BOLI.0000037349.08483.96
	NM_000161.3(GCH1):c.602G>A (p.Gly201Glu)	Dystonia 5	VCV000009274	DOI: 10.1038/ng1194-236 DOI: 10.1093/hmg/5.3.403 DOI: 10.1016/j.braindev.2010.10.015
	NG_008647.1:g.62058G>A [NM_000161.3(GCH1):c.626+1G>A]	Dystonia 5	VCV000529415	https://doi.org/10.1002/ana.410440312, DOI: 10.1001/archneur.63.11.1605
	NM_000161.3(GCH1):c.633G>A (p.Met211Ile)	GTP cyclohydrolase I deficiency	VCV000009287	DOI: 10.1074/jbc.270.17.10062 DOI: 10.1016/s0022-3476(95)70458-2
	NM_000161.3(GCH1):c.662T>C (p.Met221Thr)	Dystonia 5	VCV000009281	DOI: 10.1002/ana.410440107 DOI: 10.1212/wnl.50.4.1021

## Sheet: DYTPARK-GCH1_Variants Type
Pathogenic Variants,clinvar Pathogenic (no conflicts criteria provided) + BioPKU (Pathogenic) short variants < 50bp	56				missense	14
Pathogenic Variants,ClinVar Pathogenic (no conflicts criteria provided) long variants variants > 50bp (GTP cyclohydrolase I deficiency)	3				frameshift	13
					splicesite	15
					nonsense	8
ClinVar					delins/ins/del	1
conflicting interpretation	25				Start/Stop codon	4
Benign	38				exon deletion	1
Likely Benign	64					56	0.75
Uncertain Significance	134
Likely Patogenetic	20
Pathogenetic	59
	340

## Sheet: DDC Short Variant Pathogenetic
	HGVS Name [Other name]	Condition(s)	Accession	References
ClinVar Pathogenic (two stars)
criteria provided, multiple submitters, no conflicts	NG_008742.1:g.42324A>T [NM_001082971.2(DDC):c.714+4A>T]	Deficiency of aromatic-L-amino-acid decarboxylase	VCV000864024	DOI: 10.1016/j.ymgme.2019.03.009 DOI: 10.1002/mgg3.1143 DOI: 10.1038/s10038-020-0770-6 DOI: 10.1002/jimd.12247 DOI: 10.1002/ajmg.c.31670 DOI: 10.1002/humu.23659 DOI: 10.1038/s41467-021-24524-8
(accession Sept 16, 2022)
	NM_001082971.2(DDC):c.19C>T (p.Arg7*)	Deficiency of aromatic-L-amino-acid decarboxylase	VCV001034300	DOI: 10.1093/brain/awab123
	NM_001082971.2(DDC):c.48_49delinsAG (Tyr16*)	Deficiency of aromatic-L-amino-acid decarboxylase	VCV001353224
	NM_001082971.2(DDC):c.82C>T (p.Gln28*)	Deficiency of aromatic-L-amino-acid decarboxylase	VCV001373356
	NM_001082971.2(DDC):c.304G>A (Gly102Ser)	Deficiency of aromatic-L-amino-acid decarboxylase	VCV000017809	DOI: 10.1186/s13023-016-0522-z DOI: 10.2174/1874091X01206010131 DOI: 10.1007/s10545-011-9340-6 DOI: 10.1016/j.ymgme.2019.03.009
	NG_008742.1:g.32478del [NM_001242888.2(DDC):c.201+5906del]	Deficiency of aromatic-L-amino-acid decarboxylase	VCV001399541
	NM_001082971.2(DDC):c.446G>C (p.Ser149Thr)	Deficiency of aromatic-L-amino-acid decarboxylase	VCV000636255	DOI: 10.1007/8904_2014_327
ClinVar Pathogenic (one star)	NM_001082971.2(DDC):c.480del (Thr161Profs*3)	Deficiency of aromatic-L-amino-acid decarboxylase	VCV001075848
criteria provided, single submitter	NM_001082971.2(DDC):c.526C>T (p.Gln176*)	Deficiency of aromatic-L-amino-acid decarboxylase	VCV001385192
(accession Sept 16, 2022)	NM_001082971.2(DDC):c.564_568dup (p.Gln190Profs*13)	Deficiency of aromatic-L-amino-acid decarboxylase	VCV001355136
	NM_001082971.2(DDC):c.568C>T (p.Gln190*)	Deficiency of aromatic-L-amino-acid decarboxylase	VCV001433147
	NM_001082971.2(DDC):c.749C>T (p.Ser250Phe)	Deficiency of aromatic-L-amino-acid decarboxylase	VCV000017810	DOI: 10.1016/j.ymgme.2019.03.009 DOI: 10.1093/hmg/ddt011 DOI: 10.1097/MD.0000000000010953 doi.org/10.1016/j.parkreldis.2022.08.033
	NM_001082971.2(DDC):c.995A>G (p.Tyr332Cys)	Deficiency of aromatic-L-amino-acid decarboxylase	VCV001683497
	NM_001082971.2(DDC):c.1233del (p.Arg412Glyfs*2)	Deficiency of aromatic-L-amino-acid decarboxylase	VCV001374428
	NM_001082971.2(DDC):c.1234C>T (p.Arg412Trp)	Deficiency of aromatic-L-amino-acid decarboxylase	VCV001068764	DOI: 10.2174/1874091X01206010131 DOI: 10.1212/WNL.0b013e3181e620ae DOI: 10.4137/JCNSD.S12938 DOI: 10.1002/jimd.12247 DOI: 10.1002/mgg3.1143
	NM_001082971.2(DDC):c.1297dup (p.Ile433Asnfs*60)	Deficiency of aromatic-L-amino-acid decarboxylase	VCV001068763	DOI: 10.1016/j.ejpn.2008.03.008
	NM_001082971.2(DDC):c.260C>T (p.Pro87Leu)	Deficiency of aromatic-L-amino-acid decarboxylase	VCV000973441	DOI: 10.1002/jimd.12247 DOI: 10.1016/j.ymgme.2015.04.008 DOI: 10.1007/8904_2014_327
	NM_001082971.2(DDC):c.286G>A (p.Gly96Arg)	Deficiency of aromatic-L-amino-acid decarboxylase	VCV000973440	DOI: 10.1002/jimd.12247 DOI: 10.1016/j.abb.2020.108263 DOI: 10.1016/j.ymgme.2015.04.008
BioPKU_ PNDdb Pathogenetic	NM_001082971.2(DDC):c.823G>A (p.Ala275Thr)	Deficiency of aromatic-L-amino-acid decarboxylase	VCV000017814	DOI: 10.2174/1874091X01206010131 DOI: 10.1007/s10545-011-9340-6
(accession Sept 16, 2022)	NM_001082971.2(DDC):c.899del (p.Asn300Ilefs*8)	Deficiency of aromatic-L-amino-acid decarboxylase
	NM_001082971.2(DDC):c.1040G>A (p. Arg347Gln)	Deficiency of aromatic-L-amino-acid decarboxylase	VCV000202181	DOI: 10.1016/j.braindev.2018.08.003 DOI: 10.1002/iub.1718 DOI: 10.1016/j.bbapap.2016.03.011
	NM_001082971.2(DDC):c.1055del (p.Pro352Hisfs*9)	Deficiency of aromatic-L-amino-acid decarboxylase	VCV001074024
	NM_001082971.2(DDC):c.1073G>A (p.Arg358His)	Deficiency of aromatic-L-amino-acid decarboxylase	VCV000379626	DOI: 10.1002/iub.1718 doi:10.2174/1874091X01206010131 https://doi.org/10.1186/s13023-016-0522-z DOI: 10.1002/mgg3.1143
	NM_001082971.2(DDC):c.1140+2T>C	Deficiency of aromatic-L-amino-acid decarboxylase

## Sheet: DDC_Variants Type
Pathogenic Variants,clinvar Pathogenic (no conflicts criteria provided) + BioPKU (Pathogenic) short variants < 50bp	24			missense	10
Pathogenic Variants,ClinVar Pathogenic (no conflicts criteria provided) long variants variants > 50bp (AADC deficiency)	0			frameshift	6
				splicesite	3
ClinVar				nonsense	5
conflicting interpretation	12			delins/ins/del
Benign	52			Start/Stop codon
Likely Benign	110			exon deletion
Uncertain Significance	142				24
Likely Patogenetic	18
Pathogenetic	36

## Sheet: DNAJC12 Short Var_Pathogeneti
	HGVS Name [Other name]	Condition(s)	Accession	References
ClinVar Pathogenic (one star)	NM_021800.3(DNAJC12):c.524G>A (p.Trp175*)	Hyperphenylalaninemia due to DNAJC12 deficiency	VCV000870655	DOI: 10.1002/humu.24026
criteria provided, single submitter	NM_021800.3(DNAJC12):c.502+1G>A	not provided	VCV001457343
(accession Sept 19, 2022)	NM_021800.3(DNAJC12):c.187A>T (p.Lys63*)	Hyperphenylalaninemia due to DNAJC12 deficiency|not provided	VCV000694074	DOI: 10.1002/humu.24026

## Sheet: DBH Short Variants Pathogenetic
	Name HGVS [Other name]	Condition(s)	Accession	References
ClinVar Pathogenic (two stars)
criteria provided, multiple submitters, no conflicts	NG_008645.1:g.5350T>C [NM_000787.4(DBH):c.339+2T>C]	Dopamine beta-hydroxylase deficiency	VCV000001750	DOI: 10.1210/jc.2016-3274 DOI: 10.1002/jimd.12321
(accession Sept 16, 2022)
ClinVar Pathogenic (one star)
criteria provided, single submitter	NM_000787.4(DBH):c.468dup (Lys157Glnfs*6)	Dopamine beta-hydroxylase deficiency	VCV000846731
(accession Sept 17, 2022)

## Sheet: SLC18A2 Short Var_Pathogenetic
	Name HGVS [Other name]	Condition(s)	Accession	References
ClinVar Pathogenic (one star)
criteria provided, single submitter	NM_003054.4(SLC18A2):c.835_836delAG	Inborn genetic diseases	criteria provided, single submitter	VCV000520810	rs1431337923
(accession Sept 17, 2022)

## Sheet: MAOA Short VarPathogenetic
	Name HGVS [Other name]	Condition(s)	Accession	References
ClinVar Pathogenic (one star)	NM_000240.4(MAOA):c.133C>T (p.Arg45Trp)	MAOA	Brunner syndrome	VCV000208353	https://doi.org/10.1111/cge.12589
criteria provided, single submitter	NM_000240.4(MAOA):c.749_750insT (Ser251Lysfs*2)	MAOA	Brunner syndrome	VCV000208352	https://doi.org/10.1111/cge.12589
(accession Sept 16, 2022)	NM_000240.4(MAOA):c.1214del (p.Gly405fs*12)	MAOA	Brunner syndrome	VCV001074868
	NG_008957.2:g.92632A>G [NM_000240.4(MAOA):c.1263-2A>G]	MAOA	not provided	VCV000451098
OMIM (ClinVar Pathogenetic No assertion Criteria)	NM_000240.4(MAOA):c.886C>T (p.Gln296*)	MAOA	Brunner syndrome	VCV000009967	DOI: 10.1126/science.8211186

## Sheet: PTS Short Var Pathogenetic
	Name HGVS [Other name]	Condition(s)	Accession	References
	NM_000317.3(PTS):c.118_121del (Phe40Glyfs*17)	not provided|6-Pyruvoyl-tetrahydrobiopterin synthase deficiency	VCV000550850
	NM_000317.3(PTS):c.166G>A (p.Val56Met)	6-Pyruvoyl-tetrahydrobiopterin synthase deficiency	VCV000000481	DOI: 10.1515/jpem-2018-0037
	NM_000317.3(PTS):c.166GTG[1] (p.Val57del)	6-Pyruvoyl-tetrahydrobiopterin synthase deficiency	VCV000551630	DOI: 10.1186/s13023-016-0510-3
	NG_008743.1:g.8867G>T [NM_000317.3(PTS):c.186+1G>T]	6-Pyruvoyl-tetrahydrobiopterin synthase deficiency	VCV000556264
	NM_000317.3(PTS):c.200C>T (p.Thr67Met)	6-Pyruvoyl-tetrahydrobiopterin synthase deficiency	VCV000463151	DOI: 10.1002/jmd2.12199
ClinVar Pathogenic (two stars)	NM_000317.3(PTS):c.238A>G (p.Met80Val)	6-Pyruvoyl-tetrahydrobiopterin synthase deficiency|not provided	VCV000372484	DOI: 10.1186/s13023-016-0510-3
criteria provided, multiple submitters, no conflicts	NM_000317.3(PTS):c.259C>T (p.Pro87Ser)	not provided|6-Pyruvoyl-tetrahydrobiopterin synthase deficiency	VCV000000480	DOI: 10.3760/cma.j.cn112137-20210121-00200
(accession Sept 16, 2022)	NM_000317.3(PTS):c.260C>T (p.Pro87Leu)	not provided|6-Pyruvoyl-tetrahydrobiopterin synthase deficiency	VCV000553829	DOI: 10.1016/j.ymgme.2020.11.004
	NM_000317.3(PTS):c.272A>G (p.Lys91Arg)	6-Pyruvoyl-tetrahydrobiopterin synthase deficiency	VCV000813419	DOI: 10.1515/jpem-2018-0037
	NM_000317.3(PTS):c.286G>A (p.Asp96Asn)	6-Pyruvoyl-tetrahydrobiopterin synthase deficiency	VCV000000484	DOI: 10.3760/cma.j.cn112137-20210121-00200
	NM_000317.3(PTS):c.297C>A (p.Tyr99*)	6-Pyruvoyl-tetrahydrobiopterin synthase deficiency	VCV000370413	DOI: 10.1038/s41598-017-15063-8
	NG_008743.1:g.12066A>G [NM_000317.3(PTS):c.315-2A>G]	6-Pyruvoyl-tetrahydrobiopterin synthase deficiency	VCV000558308
	NM_000317.3(PTS):c.317C>T (p.Thr106Met)	6-Pyruvoyl-tetrahydrobiopterin synthase deficiency|not provided	VCV000552175	DOI: 10.1371/journal.pone.0249608
	NM_000317.3(PTS):c.393del (Val132Tyrfs*19)	6-Pyruvoyl-tetrahydrobiopterin synthase deficiency	VCV000556173
	NM_000317.3(PTS):c.78G>T (p.Leu26Phe)	6-Pyruvoyl-tetrahydrobiopterin synthase deficiency	VCV001308635
	NG_008743.1:g.7227C>G [NM_000317.3(PTS):c.84-3C>G]	6-Pyruvoyl-tetrahydrobiopterin synthase deficiency|not provided	VCV000553378	DOI: 10.1002/jmd2.12199
	NM_000317.3(PTS):c.73C>G (p.Arg25Gly)	6-Pyruvoyl-tetrahydrobiopterin synthase deficiency	VCV000463153	DOI: 10.1016/j.ymgme.2020.11.004
	NM_000317.3(PTS):c.73C>T (p.Arg25*)	6-Pyruvoyl-tetrahydrobiopterin synthase deficiency	VCV000859996
	NM_000317.3(PTS):c.74_76dup (p.Leu26*)	6-Pyruvoyl-tetrahydrobiopterin synthase deficiency	VCV001073651
	NM_000317.3(PTS):c.74G>A (p.Arg25Gln)	6-Pyruvoyl-tetrahydrobiopterin synthase deficiency	VCV000000476	DOI: 10.1074/jbc.270.49.29498
	NM_000317.3(PTS):c.107del (Asn36Thrfs*2)	6-Pyruvoyl-tetrahydrobiopterin synthase deficiency	VCV000941033
	NM_000317.3(PTS):c.155A>G (p.Asn52Ser)	6-Pyruvoyl-tetrahydrobiopterin synthase deficiency	VCV000000479	DOI: 10.3760/cma.j.cn112137-20210121-00200
	NM_000317.3(PTS):c.159T>G (p.Tyr53*)	6-Pyruvoyl-tetrahydrobiopterin synthase deficiency	VCV000638994
	NG_008743.1:g.8005_8059del [NM_000317.3(PTS):c.163+696_163+750del]	6-Pyruvoyl-tetrahydrobiopterin synthase deficiency	VCV000000485
ClinVar Pathogenic (one star)	NM_000317.3(PTS):c.174_175del (Val59Thrfs*5)	6-Pyruvoyl-tetrahydrobiopterin synthase deficiency	VCV001378622
criteria provided, single submitter	NM_000317.3(PTS):c.200C>A (p.Thr67Lys)	6-Pyruvoyl-tetrahydrobiopterin synthase deficiency	VCV001458067
(accession Sept 16, 2022)	NM_000317.3(PTS):c.236_239del (Tyr79Trpfs*25)	6-Pyruvoyl-tetrahydrobiopterin synthase deficiency	VCV001076000
	NM_000317.3(PTS):c.243G>A (p.Glu81=)	6-Pyruvoyl-tetrahydrobiopterin synthase deficiency	VCV001458069
	NG_008743.1:g.11871T>C [NM_000317.3(PTS):c.314+2T>C]	6-Pyruvoyl-tetrahydrobiopterin synthase deficiency	VCV001417019
	NM_000317.3(PTS):c.331G>A (p.Ala111Thr)	6-Pyruvoyl-tetrahydrobiopterin synthase deficiency	VCV001453083
	NM_000317.3(PTS):c.379C>T (p.Leu127Phe)	6-Pyruvoyl-tetrahydrobiopterin synthase deficiency	VCV001455604
	NM_000317.3(PTS):c.384T>A (p.Tyr128*)	6-Pyruvoyl-tetrahydrobiopterin synthase deficiency	VCV001451742
	NM_000317.3(PTS):c.399C>A (p.Tyr133*)	6-Pyruvoyl-tetrahydrobiopterin synthase deficiency	VCV001453091
	NM_000317.3(PTS):c.407A>T (p.Asp136Val)	6-Pyruvoyl-tetrahydrobiopterin synthase deficiency	VCV001073772
BioPKU_ PNDdb Pathogenetic	NG_008743.1:g.12067G>C [NM_000317.3(PTS):c.315-1G>A]	Hyperphenilalaninemia	VCV000554579	DOI: 10.1371/journal.pone.0249608
(accession Sept 16, 2022)

[truncated: 9 more sheets: PTS Variant Type, QDPR Short Var Pathogenetic, QDPR Variant Type, TH Short Var Pathogenetic, TH Variant Type, SPR Short Var Pathogenetic, SPR Variant Type, SLC6A3 Short Var Pathogenetic, PCBD1 Short Var Pathogenetic]
